# Supplementary material for: Ligand density quantification on colloidal inorganic nanoparticles
Source: Royal Society of Chemistry journal article supplement (doi:10.1039/c6an02206e), 2016-11-30
Supplement: c6an02206e1.pdf [file c6an02206e1.pdf]

---

Supporting Information

## Ligand density quantification on colloidal inorganic nanoparticles

Ashley M. Smith, Kathryn A. Johnston,<sup>‡</sup> Scott E. Crawford,<sup>‡</sup> Lauren E. Marbella, and Jill E. Millstone\*

Department of Chemistry, University of Pittsburgh, 219 Parkman Avenue, Pittsburgh, PA 15260, USA

---

### Table of Contents:

|                                                                                                                                               |       |
|-----------------------------------------------------------------------------------------------------------------------------------------------|-------|
| <b>Figure S1.</b> Flowchart Depicting the Process for Calculating the Number of Gold Atoms per Particle for Ligand Density Determination..... | P. S2 |
| <b>Figure S2.</b> Flowchart Depicting the Process for Calculating the Number of Ligands per Particle for Ligand Density Determination.....    | P. S2 |
| <b>Figure S3.</b> Flowchart Depicting the Process for Ligand Density Determination.....                                                       | P. S3 |

Below are flowcharts illustrating a sample calculation of nanoparticle ligand density, including the determination of both nanoparticle and ligand concentrations. Here, the flowchart uses the example of a gold nanoparticle core. However, the flowchart can easily be modified to treat nanoparticles of any composition provided the crystal structure and particle stoichiometry are known.

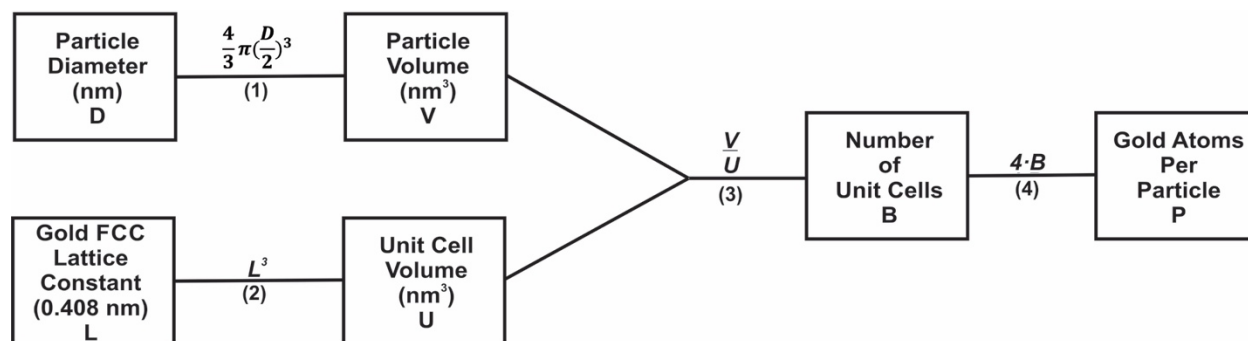

**Figure S1.** Flowchart depicting the process for calculating the number of gold atoms per particle for ligand density determination for pseudospherical particles.

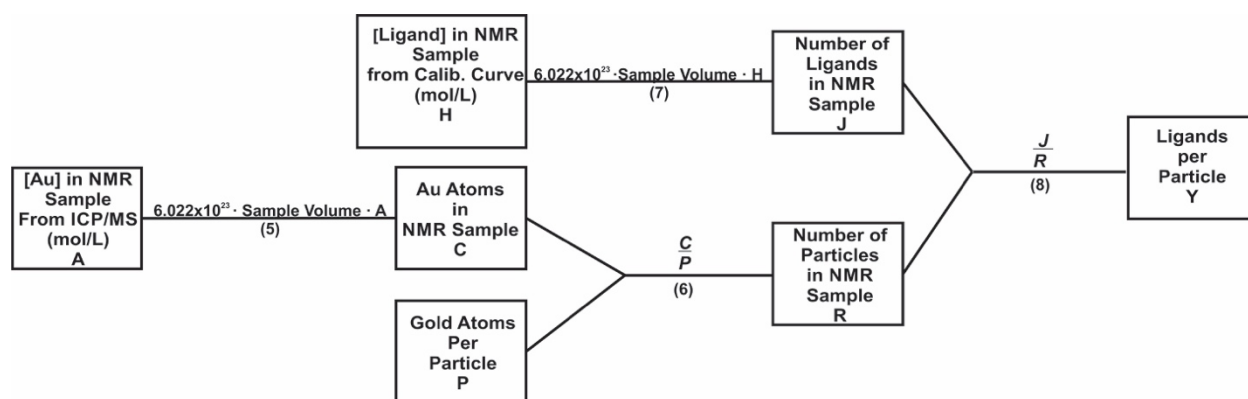

**Figure S2.** Flowchart depicting the process for calculating the number of ligands per particle for ligand density determination for pseudospherical particles.

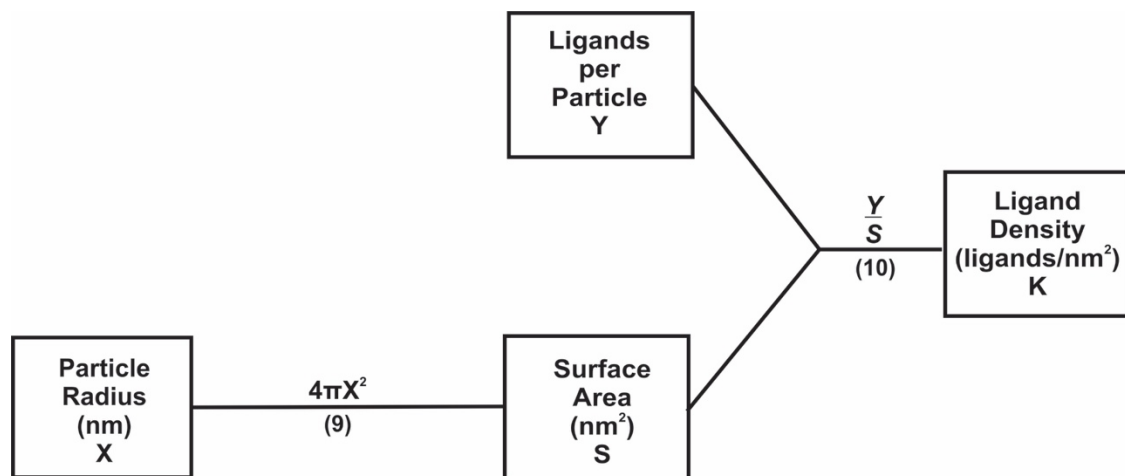

**Figure S3.** Flowchart depicting the process for ligand density determination for pseudospherical particles.
